# Supplementary material for: Skeletal muscle enhancer interactions identify genes controlling whole-body metabolism
Source: PubMed Central journal article supplement (PMC7264154; doi:10.1038/s41467-020-16537-6), 2020-06-01
Supplement: 41467_2020_16537_MOESM3_ESM.pdf [file 41467_2020_16537_MOESM3_ESM.pdf]

## Description of Additional Supplementary Files

File Name: Supplementary Data 1

Description: RNA-seq data. LogFC indicates the fold change in gene expression levels between control and palmitate, or control and TNF $\alpha$  treatment.

File Name: Supplementary Data 2

Description: GO analysis using Camera of genes up- or downregulated by palmitate or TNF $\alpha$  treatment. NGenes is the number of genes expressed.

File Name: Supplementary Data 3

Description: ChIP-seq data. Genomic position (hg38) of all identified enhancers regions (H3K4me1 and H3K27ac positive). LogFC indicates the fold change in H3K27ac levels between control and palmitate, or control and TNF $\alpha$  treatment.

File Name: Supplementary Data 4

Description: Promoter Capture Hi-C data. Data are listed as a .bedpe file.

File Name: Supplementary Data 5

Description: Complete list of enhancers overlapping one or more GWAS SNPs and interacting with a target gene promoter, and where the enhancer activity and target gene promoter is concurrently regulated by either palmitate or TNF $\alpha$  treatment. SNPs listed in bold represents primary GWAS SNPs, whereas SNPs in italic are SNPs that were found in high LD to a primary GWAS SNP.

File Name: Supplementary Data 6

Description: Summary of eQTL analysis with list of significant eGenes. The analyses were adjusted for age or for age and BMI.

File Name: Supplementary Data 7

Description: Overview of selected metabolic phenotypes in the BXD murine genetic reference population.

File Name: Supplementary Data 8

Description: Gene expression correlations in skeletal muscle with phenotypes in the BXD mouse strains. Spearman's rho, p-value and FDR value is indicated for each correlation.

File Name: Supplementary Data 9

Description: Gene expression correlations in adipose tissue with phenotypes in the BXD mouse strains. Spearman's rho, p-value and FDR value is indicated for each correlation.

File Name: Supplementary Data 10

Description: Gene expression correlations in liver tissue with phenotypes in the BXD mouse strains. Spearman's rho, p-value and FDR value is indicated for each correlation.

File Name: Supplementary Data 11

Description: Overview of all RNA-seq, ChIP-seq and promoter Promoter Capture Hi-C experiments.

File Name: Supplementary Data 12

Description: Complete list of primer sequences.
